# Supplementary material for: Director/barycentric rotation in cholesteric droplets under temperature gradient
Source: Royal Society of Chemistry journal article supplement (doi:10.1039/c4sm00670d), 2014-05-02
Supplement: c4sm00670d2.pdf [file c4sm00670d2.pdf]

### Video legend

Mechanical rotations in CC-type and striped droplets under temperature gradient. The timescale is 5 times faster than real time.
